# Supplementary material
Source: PubMed Central journal article supplement (PMC5322309)
Supplement: ismej2016157x1.pdf [file ismej2016157x1.pdf]

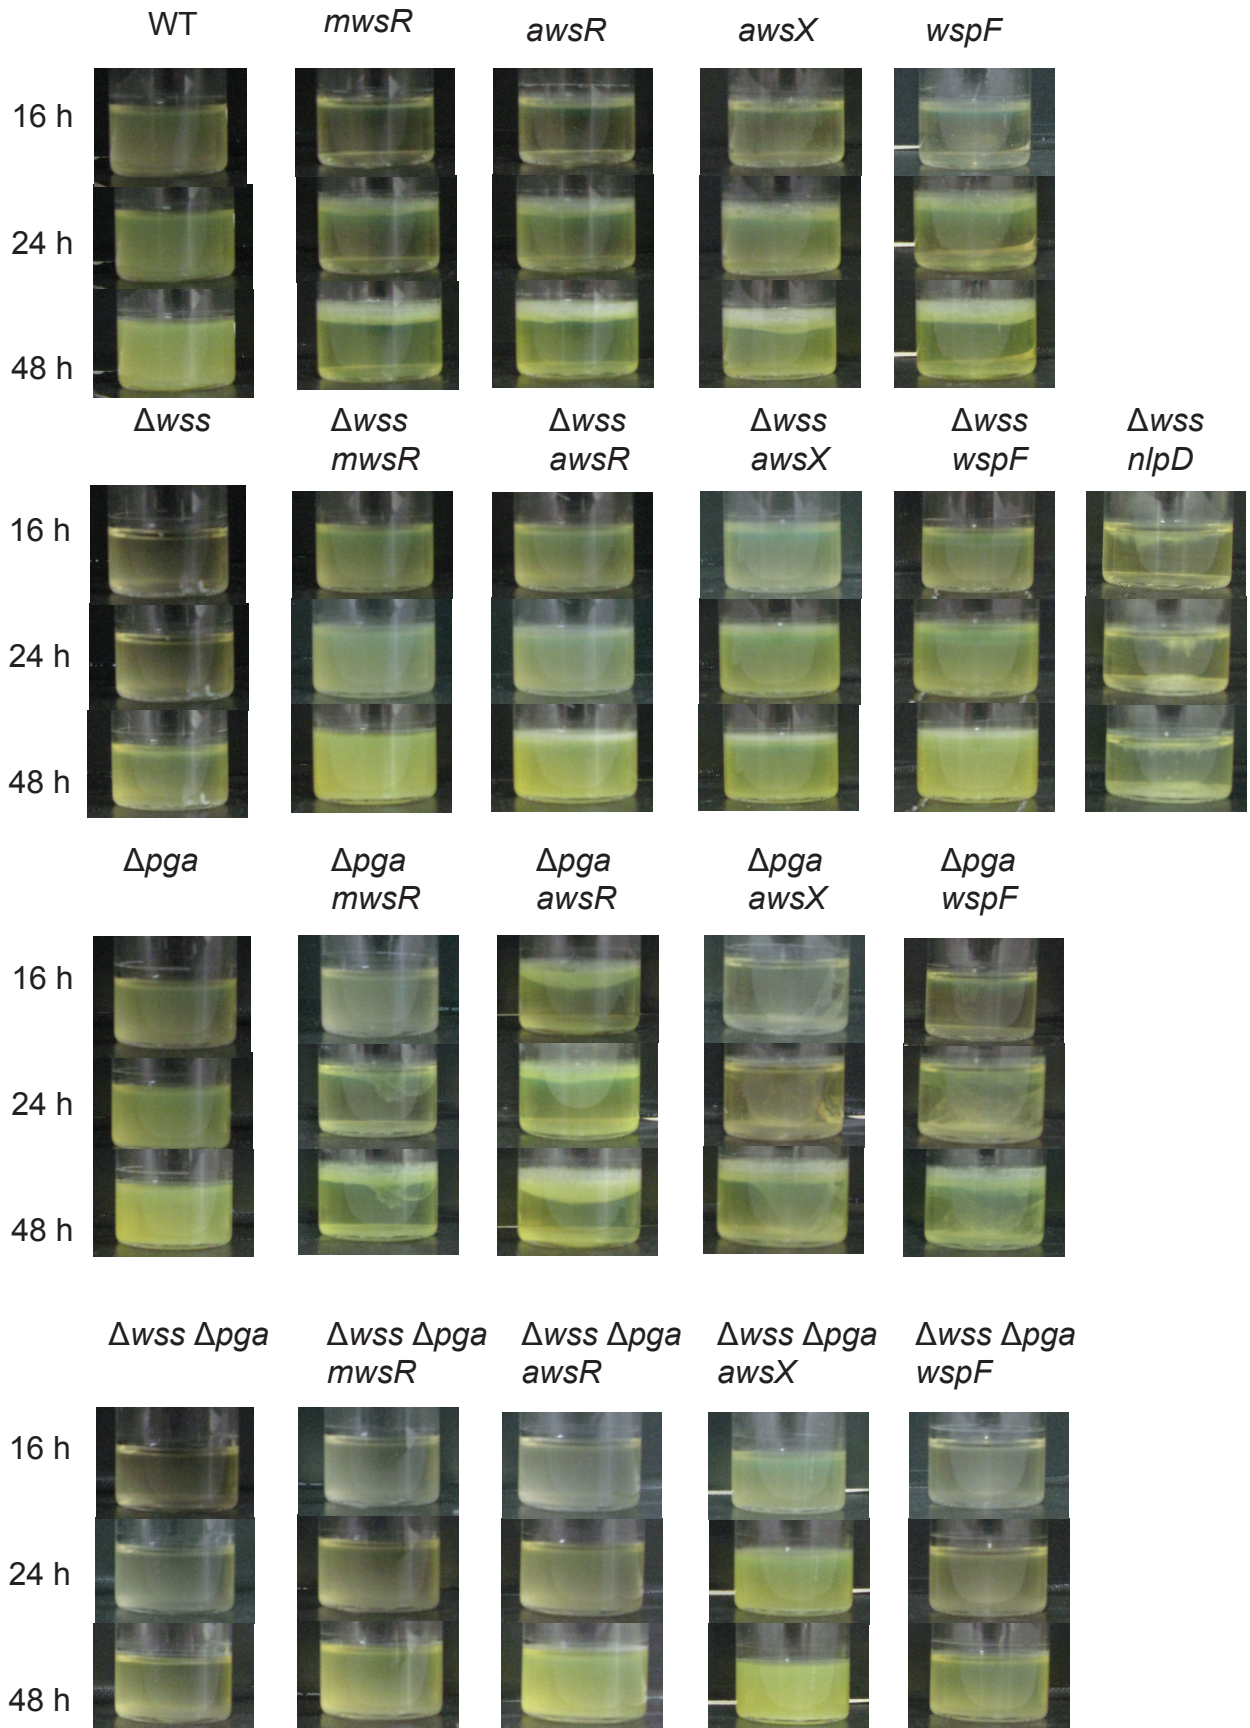

Figure S1. Growth in static microcosms of WS mutants in wild type background and without *wss* and/or *pga*.
