# Supplementary material
Source: PubMed Central journal article supplement (PMC5322309)

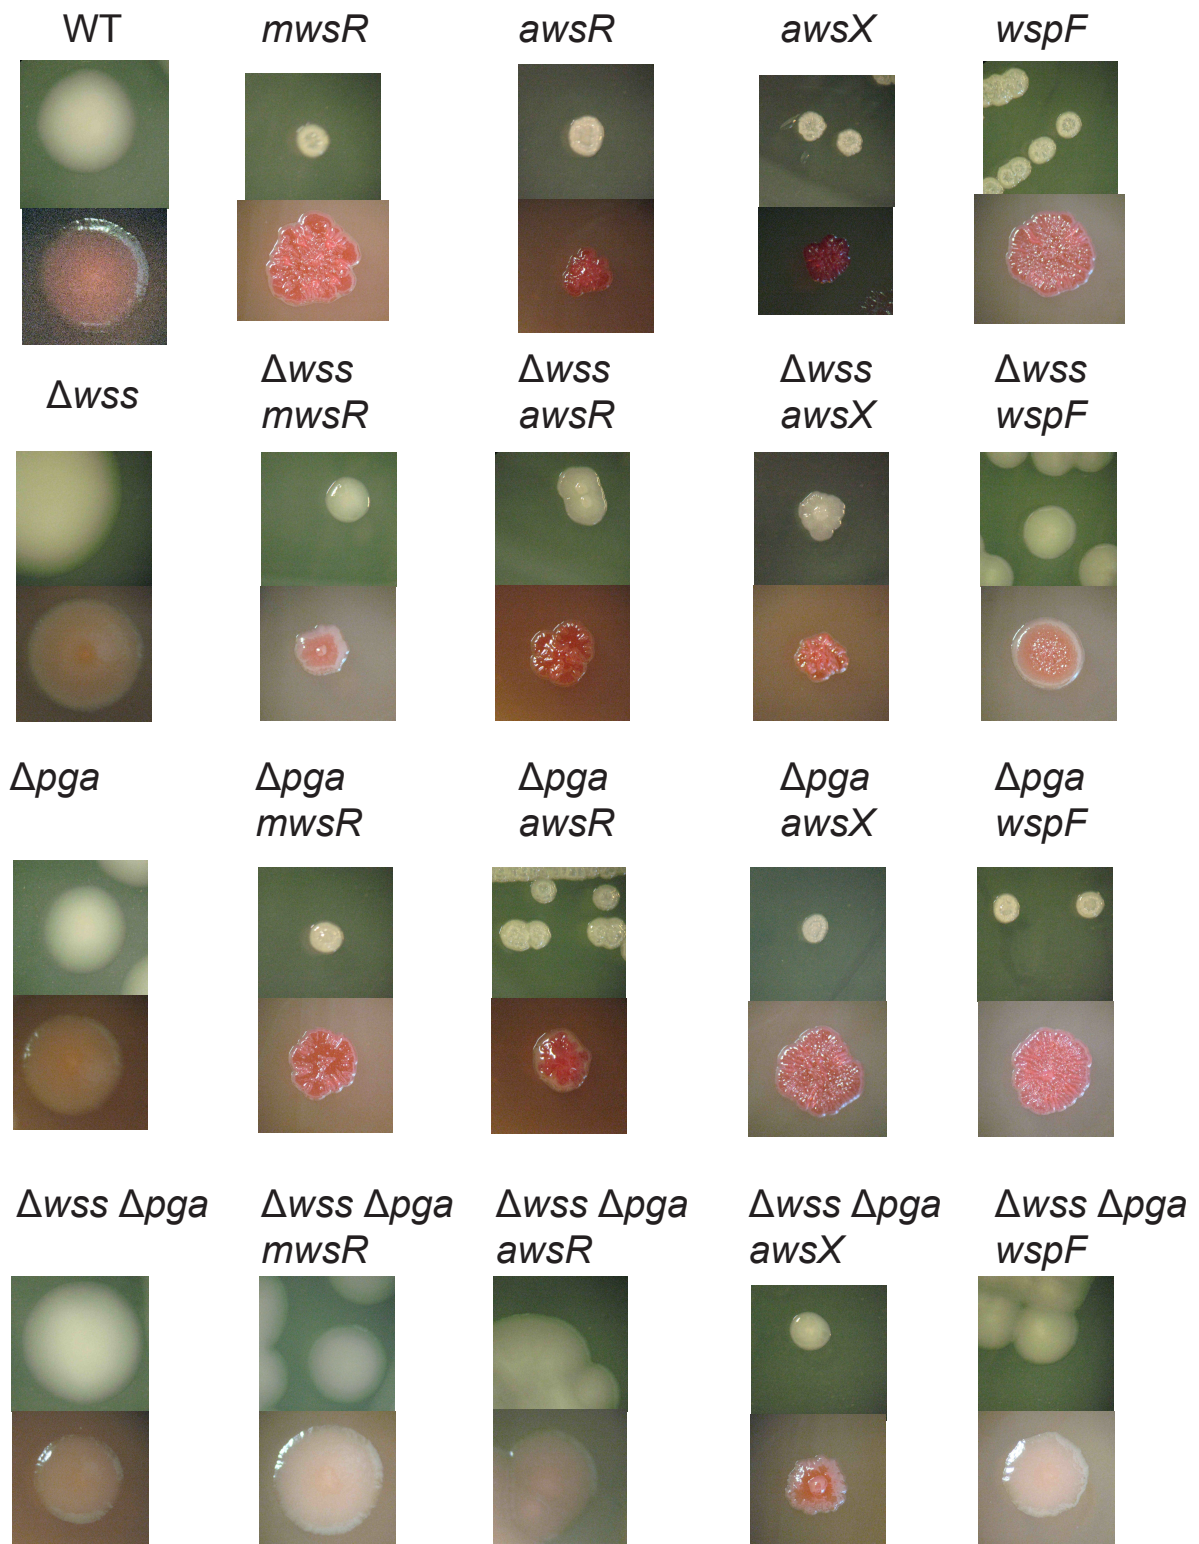

Figure S2. Colony morphology of WS mutants in wild type background and without *wss* and/or *pga*.

Supplement: ismej2016157x2.pdf [file ismej2016157x2.pdf]
